# Supplementary material for: Long Noncoding RNA HAGLROS Promotes the Malignant Progression of Bladder Cancer by Regulating the miR-330-5p/SPRR1B Axis
Source: Front Oncol. 2022 May 18;12:876090. doi: 10.3389/fonc.2022.876090 (PMC9159766; doi:10.3389/fonc.2022.876090)
Supplement: Supplementary Table 3 — Upregulated DE-mRNAs in both TCGA dataset and RNA sequencing dataset. [file Table_3.xlsx]

## Sheet: merge_up
ensembl_id	gene_name	gene_biotype	description	log2FoldChange_TCGA	pvalue_TCGA	padj_TCGA	normal_fpkm_TCGA	cancer_fpkm_TCGA	log2FoldChange	pvalue	padj	Normal-1_FPKM	Normal-2_FPKM	Normal-3_FPKM	Tumor-1_FPKM	Tumor-2_FPKM	Tumor-3_FPKM
ENSG00000123500	COL10A1	protein_coding	collagen type X alpha 1 chain	6.81726	6.85e-32	3.41e-29	0.0508783	6.90624	9.01884	2.25e-05	0.000510744	0	0	0.0116128	1.86846	2.02003	0.0597844
ENSG00000060718	COL11A1	protein_coding	collagen type XI alpha 1 chain	5.76353	1.71e-24	3.46e-22	0.0803148	4.75885	6.71872	0.00203892	0.0156395	0	0	0.10724	0.183559	1.69584	3.71404
ENSG00000178295	GEN1	protein_coding	GEN1, Holliday junction 5' flap endonuclease	1.31815	1.19e-16	6.32e-15	0.622546	1.86182	3.23485	8.15e-05	0.00139929	0.296876	1.13912	1.89967	4.52788	4.65547	4.88025
ENSG00000203326	ZNF525	protein_coding	zinc finger protein 525	1.35865	2.3e-16	1.17e-14	0.703221	2.09285	3.36581	2.98e-08	1.79e-06	1.55202	1.87298	1.7127	6.51693	13.1406	5.45525
ENSG00000159147	DONSON	protein_coding	downstream neighbor of SON	1.38848	1.75e-14	6.31e-13	2.25894	7.32844	2.84485	0.00398963	0.0255178	2.0502	1.16876	4.38982	12.1777	7.83663	2.92234
ENSG00000124575	HIST1H1D	protein_coding	histone cluster 1, H1d	3.1204	4.35e-13	1.26e-11	0.0661529	1.50057	2.73643	0.00308407	0.0212628	13.2476	48.3563	96.1478	85.874	122.356	297.675
ENSG00000151725	CENPU	protein_coding	centromere protein U	1.56693	5.54e-13	1.57e-11	2.4567	9.28331	4.29788	0.00037962	0.00456376	0.167681	0.56485	3.78166	9.14431	13.3626	17.4599
ENSG00000274290	HIST1H2BE	protein_coding	histone cluster 1, H2be	3.26152	1.29e-12	3.41e-11	0.0785283	1.18525	2.27383	4.01e-09	7.65e-07	2.71656	4.16939	4.83431	6.92494	9.79795	10.1492
ENSG00000143499	SMYD2	protein_coding	SET and MYND domain containing 2	1.07956	1.35e-12	3.58e-11	4.42393	10.7746	1.74363	0.00309815	0.0213283	1.77702	4.43527	4.63177	5.08883	6.41937	5.17963
ENSG00000169469	SPRR1B	protein_coding	small proline rich protein 1B	4.83274	5.27e-12	1.28e-10	152.044	121.749	11.8274	0.00152482	0.0128236	0	0	0	19.8193	0	86.8393
ENSG00000127328	RAB3IP	protein_coding	RAB3A interacting protein	1.63188	2.57e-09	3.69e-08	0.907898	3.34649	2.74421	0.0068449	0.0380794	0.510396	0.742664	1.83063	4.67908	2.8377	0.958712
ENSG00000050344	NFE2L3	protein_coding	nuclear factor, erythroid 2 like 3	1.59737	2.76e-09	3.94e-08	2.98848	10.212	3.29194	0.0041512	0.0262277	0.339015	2.08361	2.39876	2.39212	3.2396	18.4163
ENSG00000178445	GLDC	protein_coding	glycine decarboxylase	3.18081	1.43e-08	1.75e-07	1.3723	3.89977	7.81519	0.00223715	0.0167204	0	0.0717686	0.0247872	5.7192	2.7718	0
ENSG00000088386	SLC15A1	protein_coding	solute carrier family 15 member 1	2.5987	1.9e-08	2.27e-07	0.561463	3.74313	6.1466	0.00178129	0.0142794	0	0.459117	0.0105712	1.70087	4.94736	10.3402
ENSG00000155893	PXYLP1	protein_coding	2-phosphoxylose phosphatase 1	1.28614	2.66e-08	3.09e-07	1.54508	4.31297	2.51212	0.00116741	0.0104836	0.655375	0.885878	0.701715	0.979097	1.15699	4.50282
ENSG00000203772	SPRN	protein_coding	shadow of prion protein homolog (zebrafish)	1.15183	9.51e-08	9.89e-07	0.771207	1.92745	8.74347	1.53e-12	1.02e-09	0.0287818	0.0410192	0.155837	20.6118	3.28577	19.2545
ENSG00000134827	TCN1	protein_coding	transcobalamin 1	3.63877	1.14e-07	1.17e-06	3.53284	17.0658	10.7221	2.61e-09	5.61e-07	0	0.0809003	0.139705	10.2347	153.794	8.63066
ENSG00000173193	PARP14	protein_coding	poly(ADP-ribose) polymerase family member 14	1.06327	1.87e-07	1.83e-06	4.95437	12.2881	3.42589	0.000615874	0.00648161	5.5802	9.29148	26.1538	37.1633	25.9518	152.186
ENSG00000215788	TNFRSF25	protein_coding	tumor necrosis factor receptor superfamily member 25	1.11278	3.1e-07	2.88e-06	2.27122	5.66675	3.8676	0.00232715	0.0172549	1.81825	3.83456	0.496637	3.11694	6.85628	40.0558
ENSG00000134321	RSAD2	protein_coding	radical S-adenosyl methionine domain containing 2	2.13081	3.45e-07	3.17e-06	1.2543	6.49986	4.82094	0.00861552	0.0454512	1.13608	0.557399	2.77768	8.9754	0.0379673	55.5949
ENSG00000169894	MUC3A	protein_coding	mucin 3A, cell surface associated	2.74323	4.73e-07	4.21e-06	0.127921	1.03134	5.37978	0.00234681	0.0173593	0.304742	0.688129	0.272729	17.4057	3.34021	0.0401156
ENSG00000197372	ZNF675	protein_coding	zinc finger protein 675	1.15935	6.23e-07	5.4e-06	0.682581	1.75409	3.7243	5.66e-08	3.15e-06	0.544025	1.39938	2.1749	5.00833	9.92734	10.9613
ENSG00000167244	IGF2	protein_coding	insulin like growth factor 2	3.28445	9.64e-07	7.98e-06	33.7232	356.824	6.64585	0.00215827	0.0162283	0.322502	0.0735394	0.082546	16.6071	3.36615	0
ENSG00000152926	ZNF117	protein_coding	zinc finger protein 117	1.69175	1.14e-06	9.27e-06	1.24012	4.81935	4.09355	0.000246023	0.00327855	2.12211	1.36817	3.57716	2.89472	10.9355	50.6379
ENSG00000164694	FNDC1	protein_coding	fibronectin type III domain containing 1	2.63334	1.2e-06	9.72e-06	0.434789	3.13449	5.10473	0.000566819	0.00617056	0.105083	0.112321	0.122844	0.0221335	3.77565	2.36325
ENSG00000120068	HOXB8	protein_coding	homeobox B8	2.2917	4.15e-06	2.97e-05	2.36689	5.58066	5.85543	0.00924696	0.04777	0.0877909	2.43979	0.280882	25.2222	47.6956	0
ENSG00000135253	KCP	protein_coding	kielin/chordin-like protein	1.57558	5.19e-06	3.63e-05	0.294586	1.01883	4.91706	0.00345657	0.0231223	0.0436031	0.776776	0.0590216	1.72661	0.28889	12.1264
ENSG00000244067	GSTA2	protein_coding	glutathione S-transferase alpha 2	3.91128	9.19e-06	6.03e-05	0.203112	1.22053	8.11013	0.000257319	0.00340479	0	0	0.168753	15.7133	0.559129	1.73753
ENSG00000213889	PPM1N	protein_coding	protein phosphatase, Mg2+/Mn2+ dependent 1N (putative)	1.85673	1.54e-05	9.51e-05	0.830296	3.25111	5.35687	0.0004264	0.00497394	0.122561	0.399247	0.155127	5.78254	5.85367	0.0887348
ENSG00000181381	DDX60L	protein_coding	DEAD-box helicase 60-like	1.13815	1.81e-05	0.000110206	1.1353	2.87024	3.13549	0.000413175	0.00487164	0.999835	2.24824	5.04899	5.8405	19.99	8.03247
ENSG00000154760	SLFN13	protein_coding	schlafen family member 13	1.62222	2.53e-05	0.000147714	0.738068	2.78251	2.69377	0.00816653	0.043575	0.246088	1.29284	0.489269	1.17082	4.01339	1.076
ENSG00000145949	MYLK4	protein_coding	myosin light chain kinase family member 4	1.87019	2.98e-05	0.000170291	0.261628	1.23721	2.17498	0.004505	0.0278597	0.609211	1.18588	0.314495	1.12669	1.57514	1.99559
ENSG00000166394	CYB5R2	protein_coding	cytochrome b5 reductase 2	1.01465	3.22e-05	0.000182288	1.50457	3.37103	3.47021	0.00103493	0.00958912	0.303729	1.82103	1.61359	6.21213	9.99231	2.07011
ENSG00000137965	IFI44	protein_coding	interferon induced protein 44	1.4585	3.96e-05	0.000218829	8.39203	26.2595	3.68091	0.00013033	0.00201361	3.90953	10.5139	11.2417	28.2117	17.2907	119.89
ENSG00000101210	EEF1A2	protein_coding	eukaryotic translation elongation factor 1 alpha 2	2.35879	5.69e-05	0.000301604	5.78967	32.2681	4.76701	0.00675087	0.0377242	0.0733438	0.888487	0.261735	9.11455	4.2239	0.0464638
ENSG00000204267	TAP2	protein_coding	transporter 2, ATP-binding cassette, sub-family B (MDR/TAP)	1.05185	6.26e-05	0.000327426	4.0819	9.91399	3.54073	0.00409289	0.0259471	0.732635	1.767	2.25387	8.97399	0.631885	16.1731
ENSG00000103888	CEMIP	protein_coding	cell migration inducing hyaluronan binding protein	1.54201	7.06e-05	0.000363703	0.809073	3.21379	4.3731	3.85e-06	0.000122875	0.12404	0.488247	1.01177	2.44843	7.9232	5.44823
ENSG00000128298	BAIAP2L2	protein_coding	BAI1 associated protein 2 like 2	1.67304	7.11e-05	0.000365655	0.914619	3.38012	4.80974	0.00397668	0.0254611	0.461475	1.31537	0.206498	5.72598	20.6112	0.106308
ENSG00000185507	IRF7	protein_coding	interferon regulatory factor 7	1.11838	0.000100272	0.000495371	7.00824	17.1474	3.43808	0.00378726	0.0247058	2.0726	5.32175	3.35563	8.48568	2.65384	49.8291
ENSG00000168394	TAP1	protein_coding	transporter 1, ATP-binding cassette, sub-family B (MDR/TAP)	1.25883	0.000114819	0.0005574	17.652	48.5324	2.37171	0.00934193	0.0481806	5.87394	10.3341	13.3543	15.4387	7.33372	53.3191
ENSG00000131203	IDO1	protein_coding	indoleamine 2,3-dioxygenase 1	2.20914	0.000156484	0.000733254	2.84307	15.061	7.48969	0.00396081	0.0253943	0	0	0.434855	12.0488	0.112563	21.8273
ENSG00000118271	TTR	protein_coding	transthyretin	3.49799	0.000195232	0.000889619	0.21688	7.46529	10.9786	6.83e-07	2.87e-05	0	0	0	1.20349	12.1079	1.33358
ENSG00000213190	MLLT11	protein_coding	myeloid/lymphoid or mixed-lineage leukemia; translocated to, 11	1.0611	0.000286528	0.00124187	2.51429	6.91472	4.00553	1.41e-05	0.000350087	1.52443	0.661219	2.94705	18.4277	7.74671	9.12549
ENSG00000180209	MYLPF	protein_coding	myosin light chain, phosphorylatable, fast skeletal muscle	1.28605	0.000560783	0.00221983	0.272195	1.1585	8.4045	0.00331531	0.0224101	0	0.114663	0	6.23623	0	2.85426
ENSG00000105880	DLX5	protein_coding	distal-less homeobox 5	1.48276	0.000689532	0.00266088	1.52376	4.98671	8.07346	9.27e-11	3.26e-08	0.128761	0.367014	0.0507031	21.6099	36.8538	5.22053
ENSG00000166415	WDR72	protein_coding	WD repeat domain 72	1.4926	0.00119569	0.00425746	1.64056	5.44779	6.84075	0.000926923	0.00884747	0	0.119746	0.015509	0.035395	4.34641	3.48646
ENSG00000132530	XAF1	protein_coding	XIAP associated factor 1	1.12993	0.00161638	0.00550648	0.891942	2.26218	4.44345	5.47e-06	0.000164221	5.69575	6.18749	5.1449	89.0038	13.0402	62.8714
